# Supplementary material for: Conjoint research of WGCNA, single-cell transcriptome and structural biology reveals the potential targets of IDD development and treatment and JAK3 involvement
Source: publisher site journal article supplement (doi:10.18632/aging.205289), 2023-12-12
Supplement: Supplementary file [file aging-v15i24-205289-supplementary-material-SD1.pdf]

## SUPPLEMENTARY FIGURES

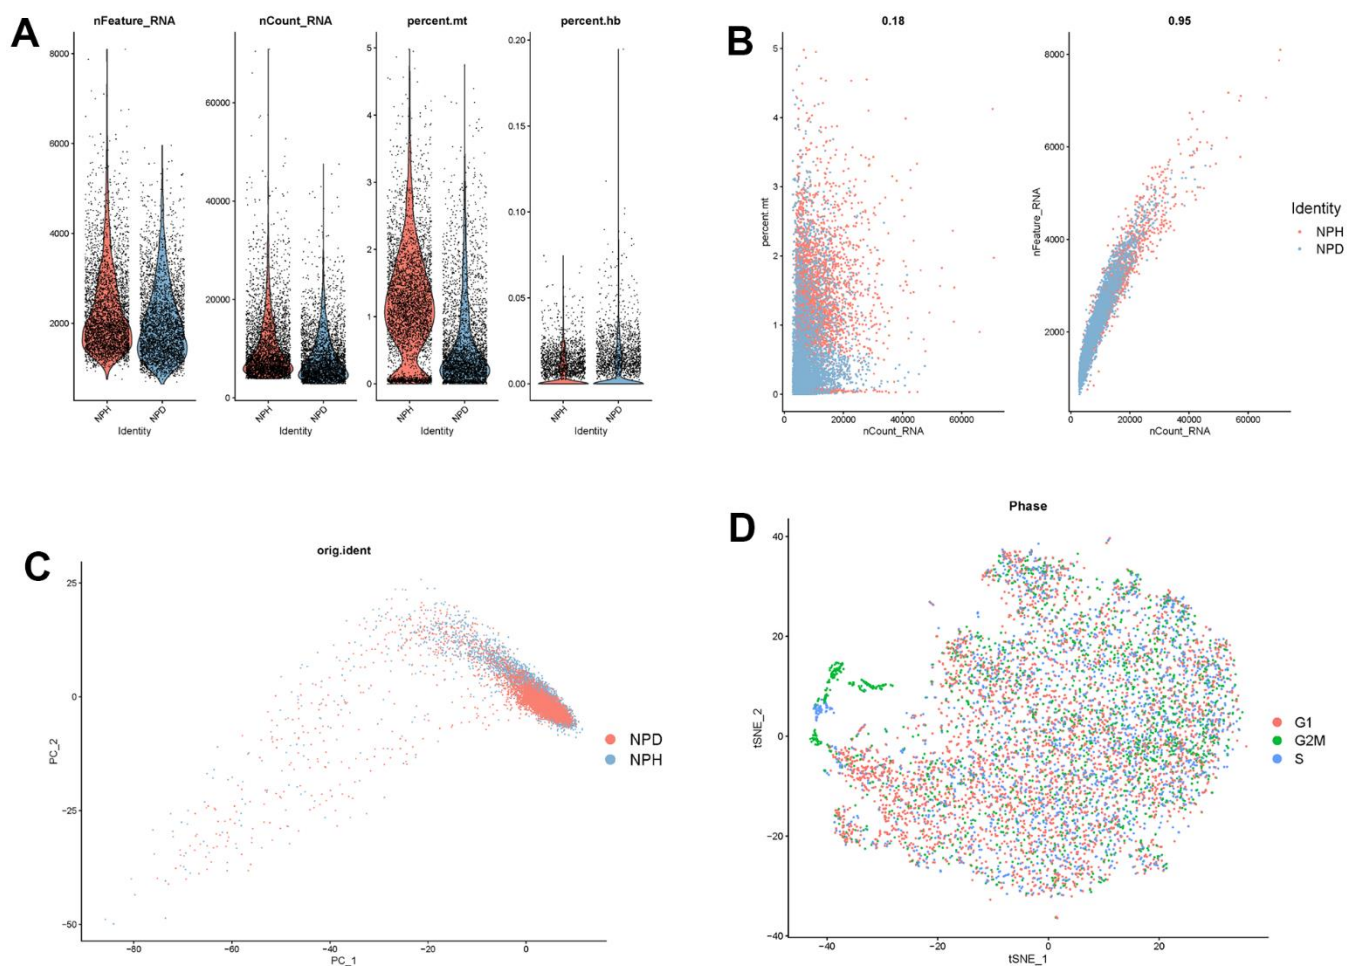

**Supplementary Figure 1. Quality check process of the scRNA-seq analysis.** (A) Violin plot showing the existed cells after quality control. (B) The left panel indicated the mitochondria UMI rate of each cell, the right panel suggested the correlations between the genes and sequencing depth. (C) Scatter plot of the cells distribution after batch effects elimination. (D) Scatter plot of the cycle's distribution after cell cycle-related genes integration.

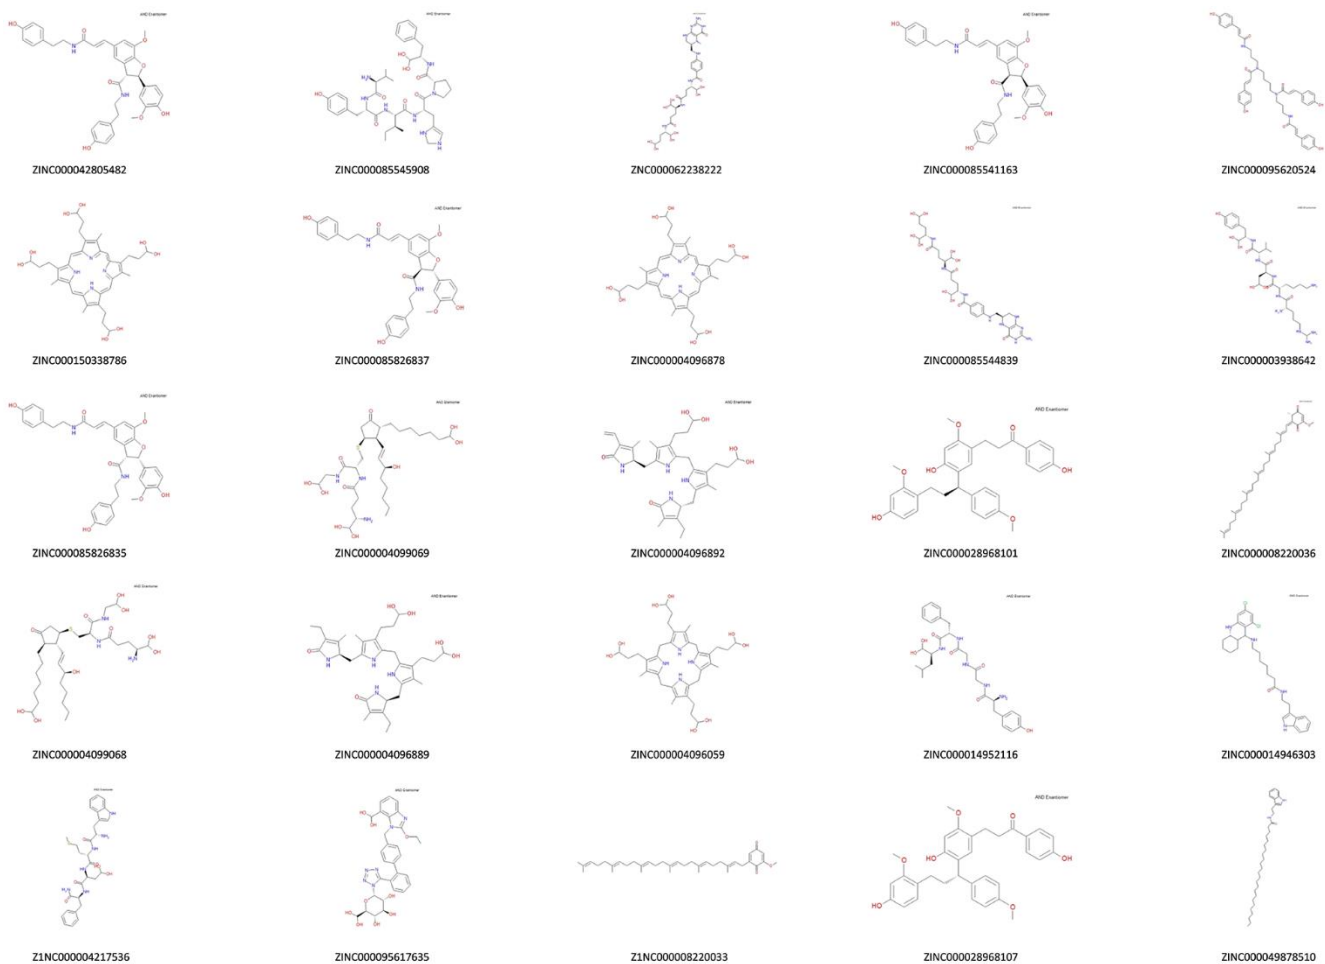

Supplementary Figure 2. The chemical structures of the top 20 compounds by Libdock module.
